# Supplementary material for: Placental genomics mediates genetic associations with complex health traits and disease
Source: Nat Commun. 2022 Feb 4;13:706. doi: 10.1038/s41467-022-28365-x (PMC8817049; doi:10.1038/s41467-022-28365-x)
Supplement: Supplementary file 1 — Supplementary Information [file 41467_2022_28365_MOESM1_ESM.pdf]

## SUPPLEMENTAL INFORMATION

Genetic control of fetal placental genomics contributes to development of health and disease

### SUPPLEMENTAL FIGURES

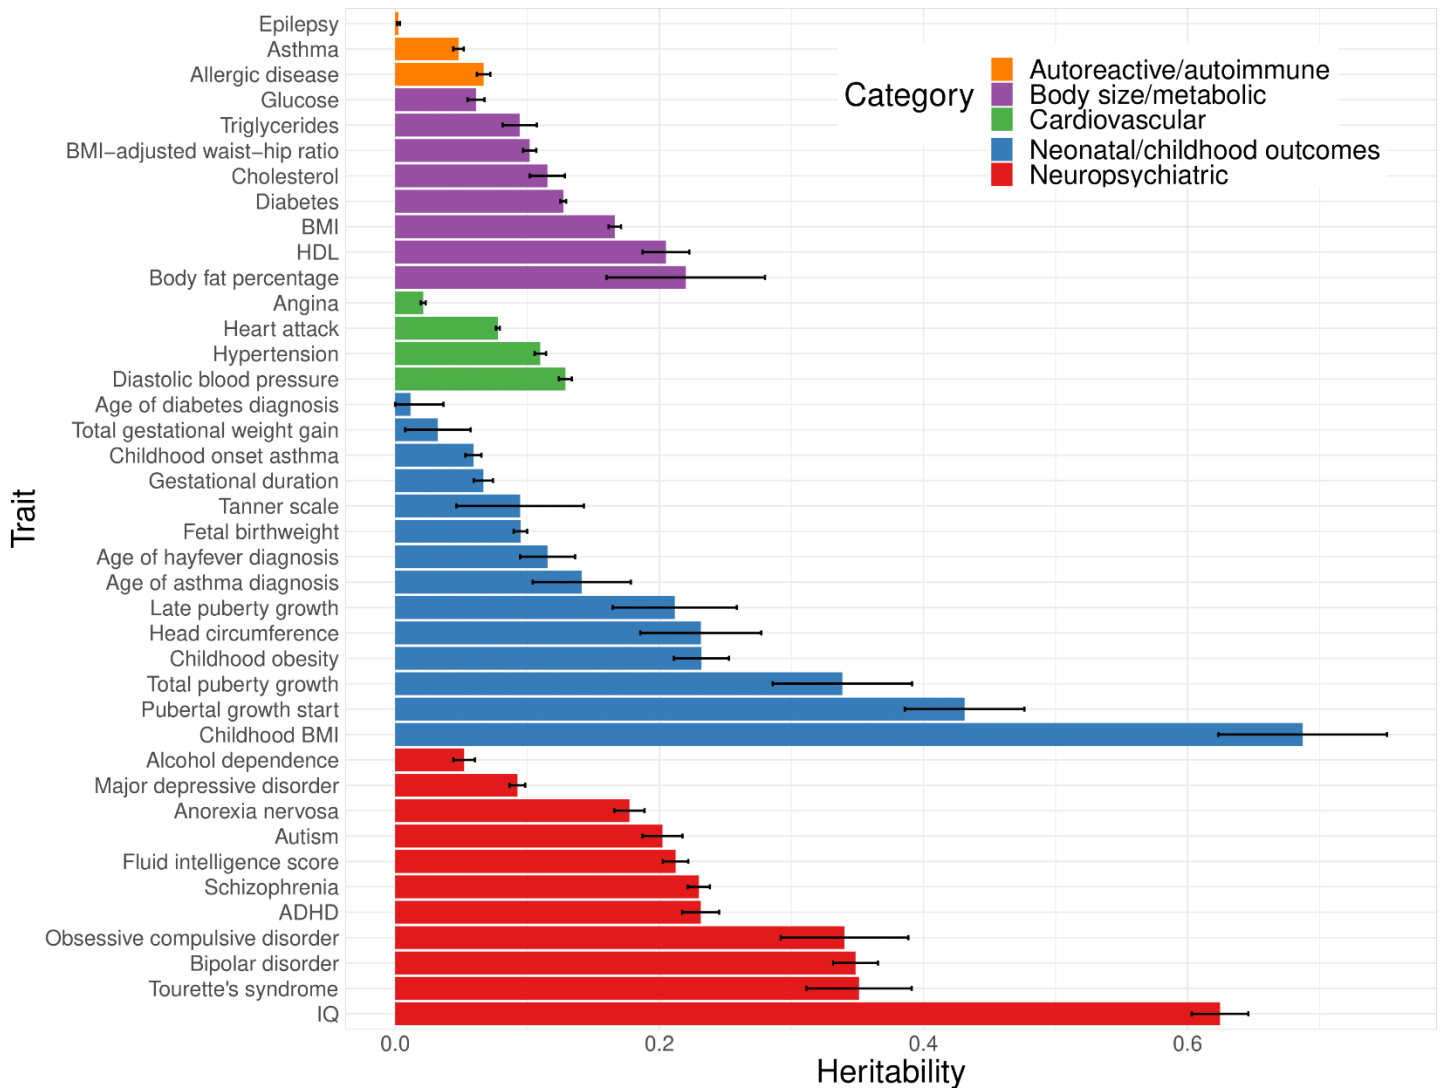

**Figure S1: SNP heritability of 40 traits.** Estimates of SNP heritability (magnitude of bar) with 95% Wald-type confidence interval (X-axis), grouped and colored by trait category (Y-axis). Sample sizes for trait are provided in Supplemental Table S1.

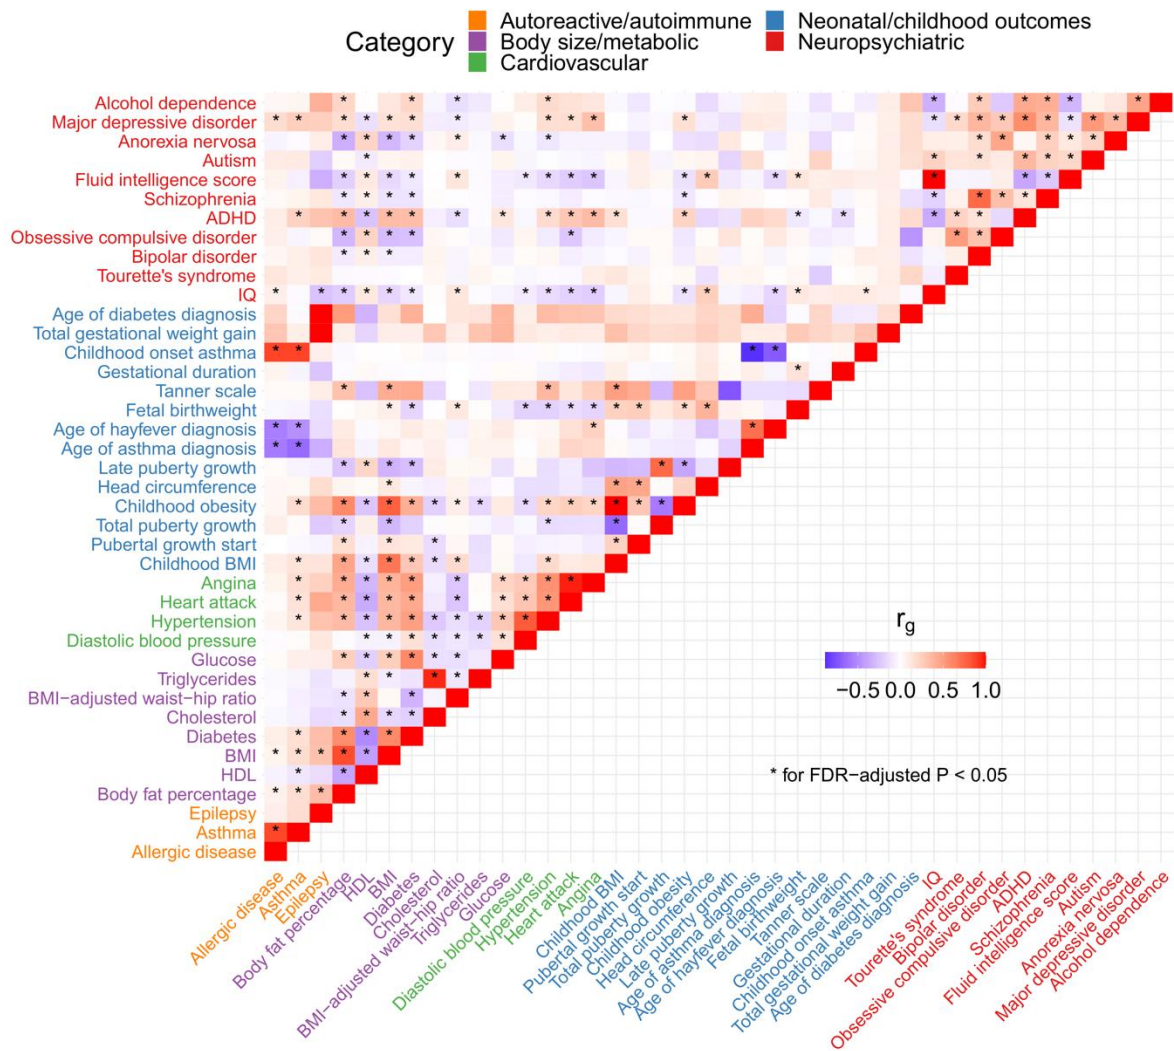

**Figure S2: SNP-based genetic correlation between 40 traits.** Heatmap of estimates of SNP-based genetic correlated between traits, grouped and colored by trait category. Correlations are marked with an asterisk are significantly non-zero with FDR-adjusted  $P < 0.05$  (two-sided Wald-type test). Exact P-values are provided in Supplemental Table S3.

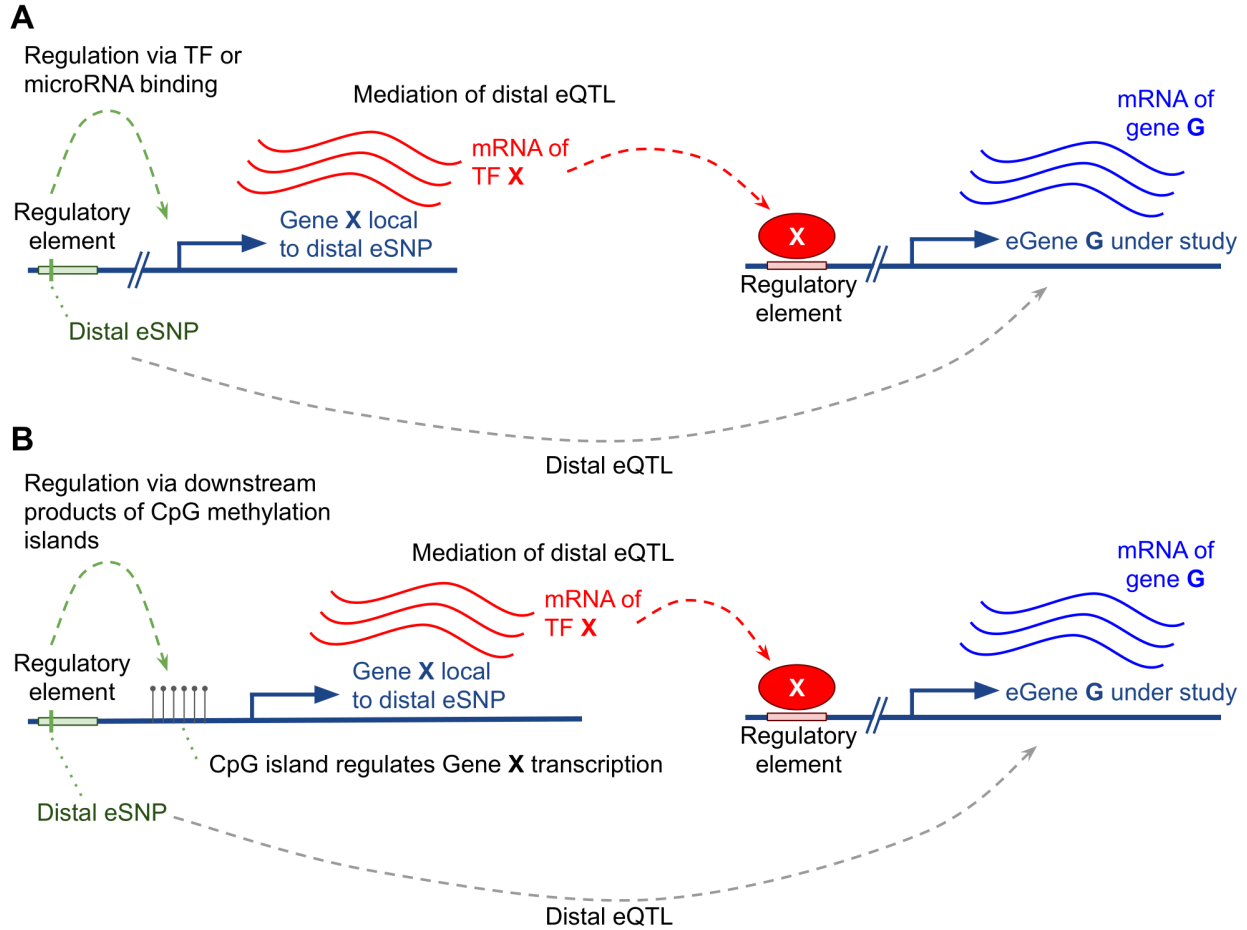

**Figure S3: Example of a biological mechanism MOSTWAS leverages in its predictive models.** Here, assume a SNP (in green) within a regulatory element affects the transcription of gene X (A) or the hyper- or hypomethylation of a CpG island upstream of gene X (B) that codes for a transcription factor or a microRNA hairpin. Transcription factor or microRNA X then binds to a distal regulatory region and affects the transcription of gene G. The association between the expression of gene X and gene G is leveraged in the first step of MeTWAS. A distal-eQTL association is also conferred between this distal-SNP and the eGene G, which is leveraged in the DePMA training process.

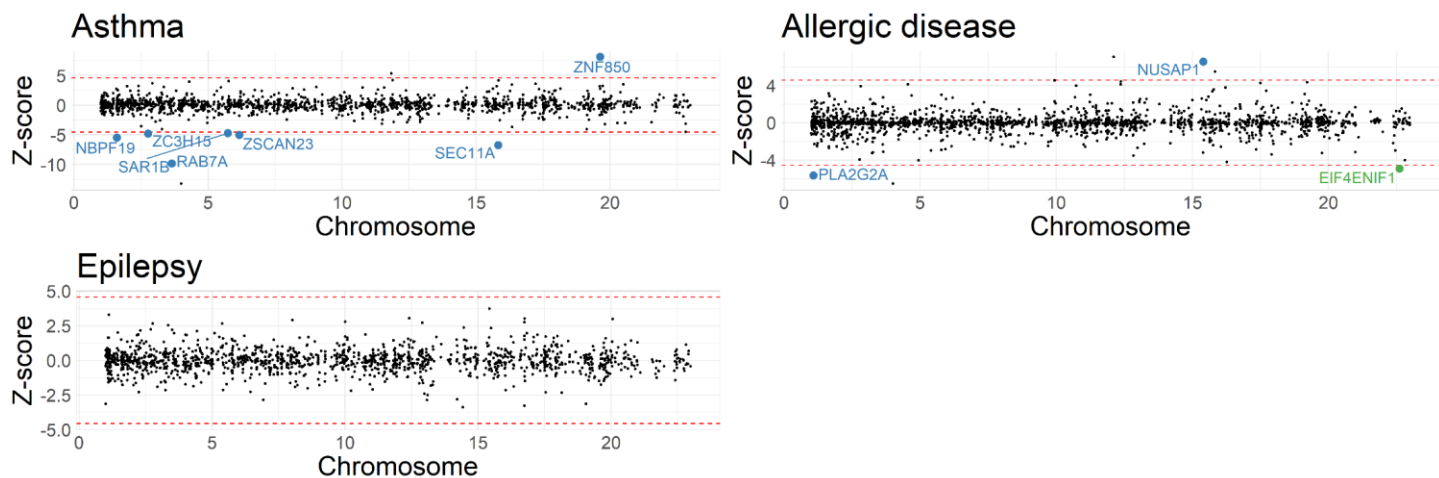

**Figure S4: TWAS Miami plots for autoimmune/autoreactive disorders.** Weighted two-sided Z-scores for TWAS associations (Y-axis) over genomic location of genes (X-axis). Red lines show Z-scores corresponding to  $P < 2.5 \times 10^{-6}$ . Genes labelled have  $P < 2.5 \times 10^{-6}$ , nominal permutation  $P < 0.05$ , and genes in green showed Benjamini-Hochberg FDR-adjusted  $P < 0.05$  for the distal-SNPs added-last test.

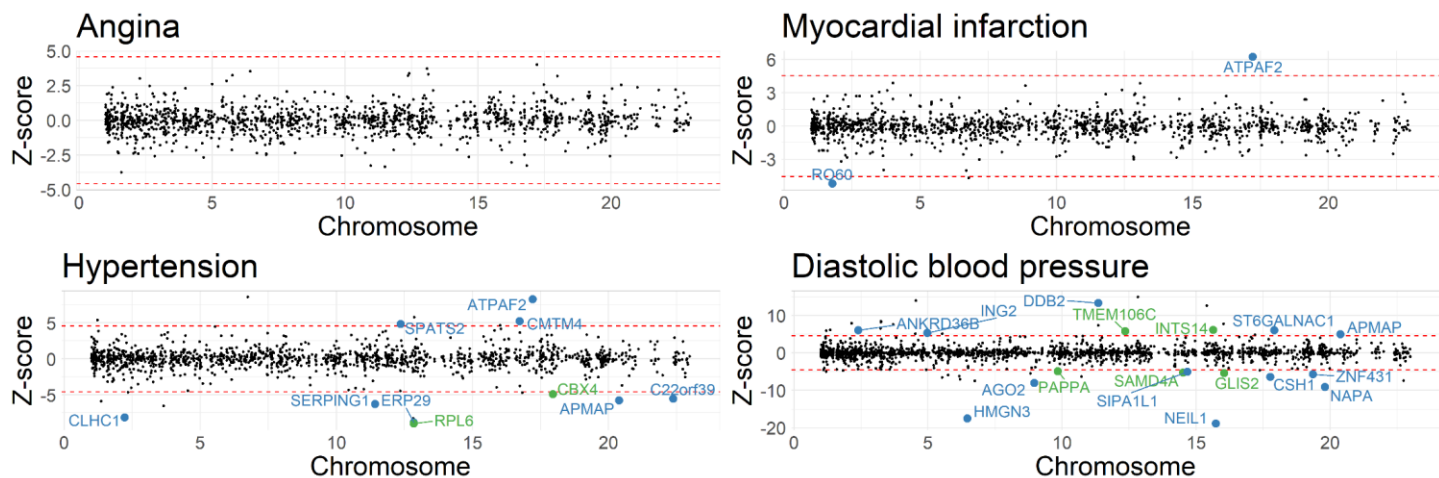

**Figure S5: TWAS Miami plots for cardiovascular disorders.** Weighted two-sided Z-scores for TWAS associations (Y-axis) over genomic location of genes (X-axis). Red lines show Z-scores corresponding to  $P < 2.5 \times 10^{-6}$ . Genes labelled have  $P < 2.5 \times 10^{-6}$ , nominal permutation  $P < 0.05$ , and genes in green showed Benjamini-Hochberg FDR-adjusted  $P < 0.05$  for the distal-SNPs added-last test.

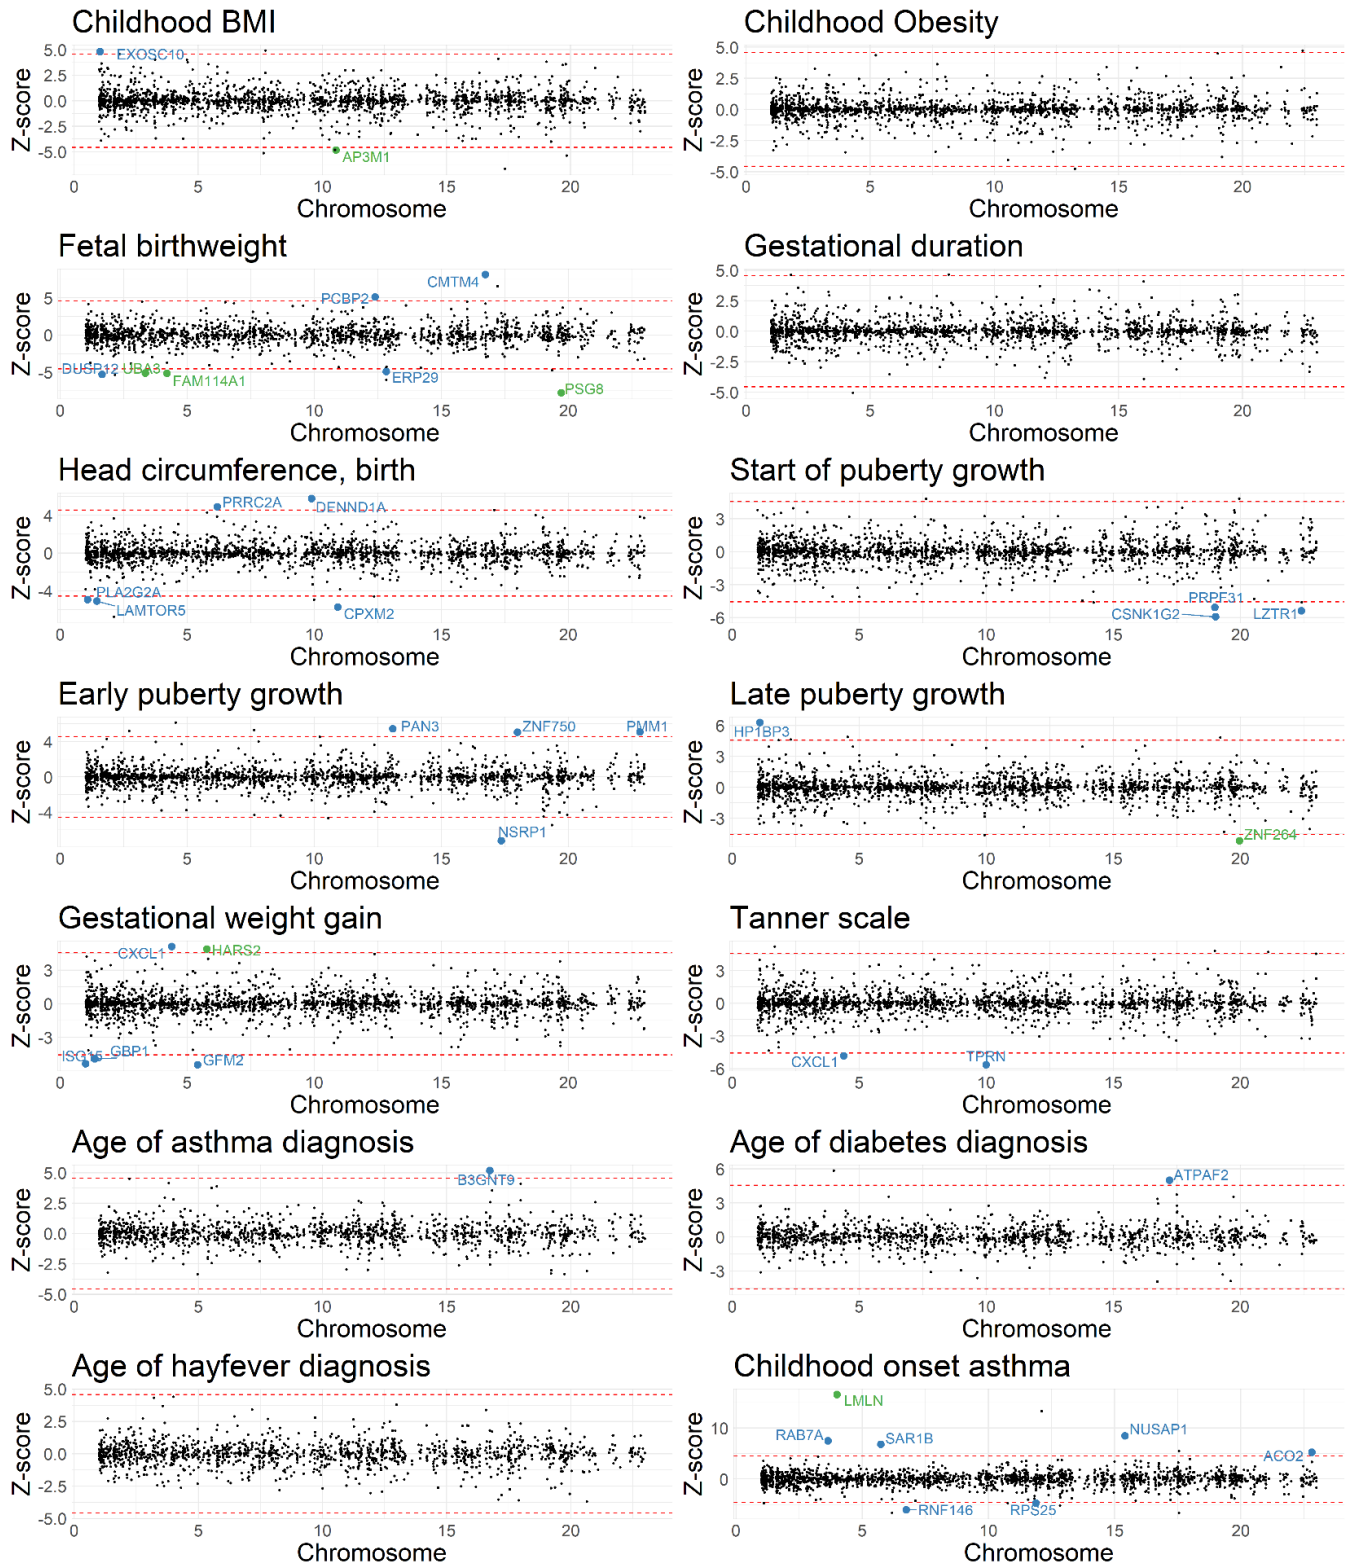

**Figure S6: TWAS Miami plots for neonatal/childhood outcomes.** Weighted two-sided Z-scores for TWAS associations (Y-axis) over genomic location of genes (X-axis). Red lines show Z-scores corresponding to  $P < 2.5 \times 10^{-6}$ . Genes labelled have  $P < 2.5 \times 10^{-6}$ , nominal permutation  $P < 0.05$ , and genes in green showed Benjamini-Hochberg FDR-adjusted  $P < 0.05$  for the distal-SNPs added-last test.

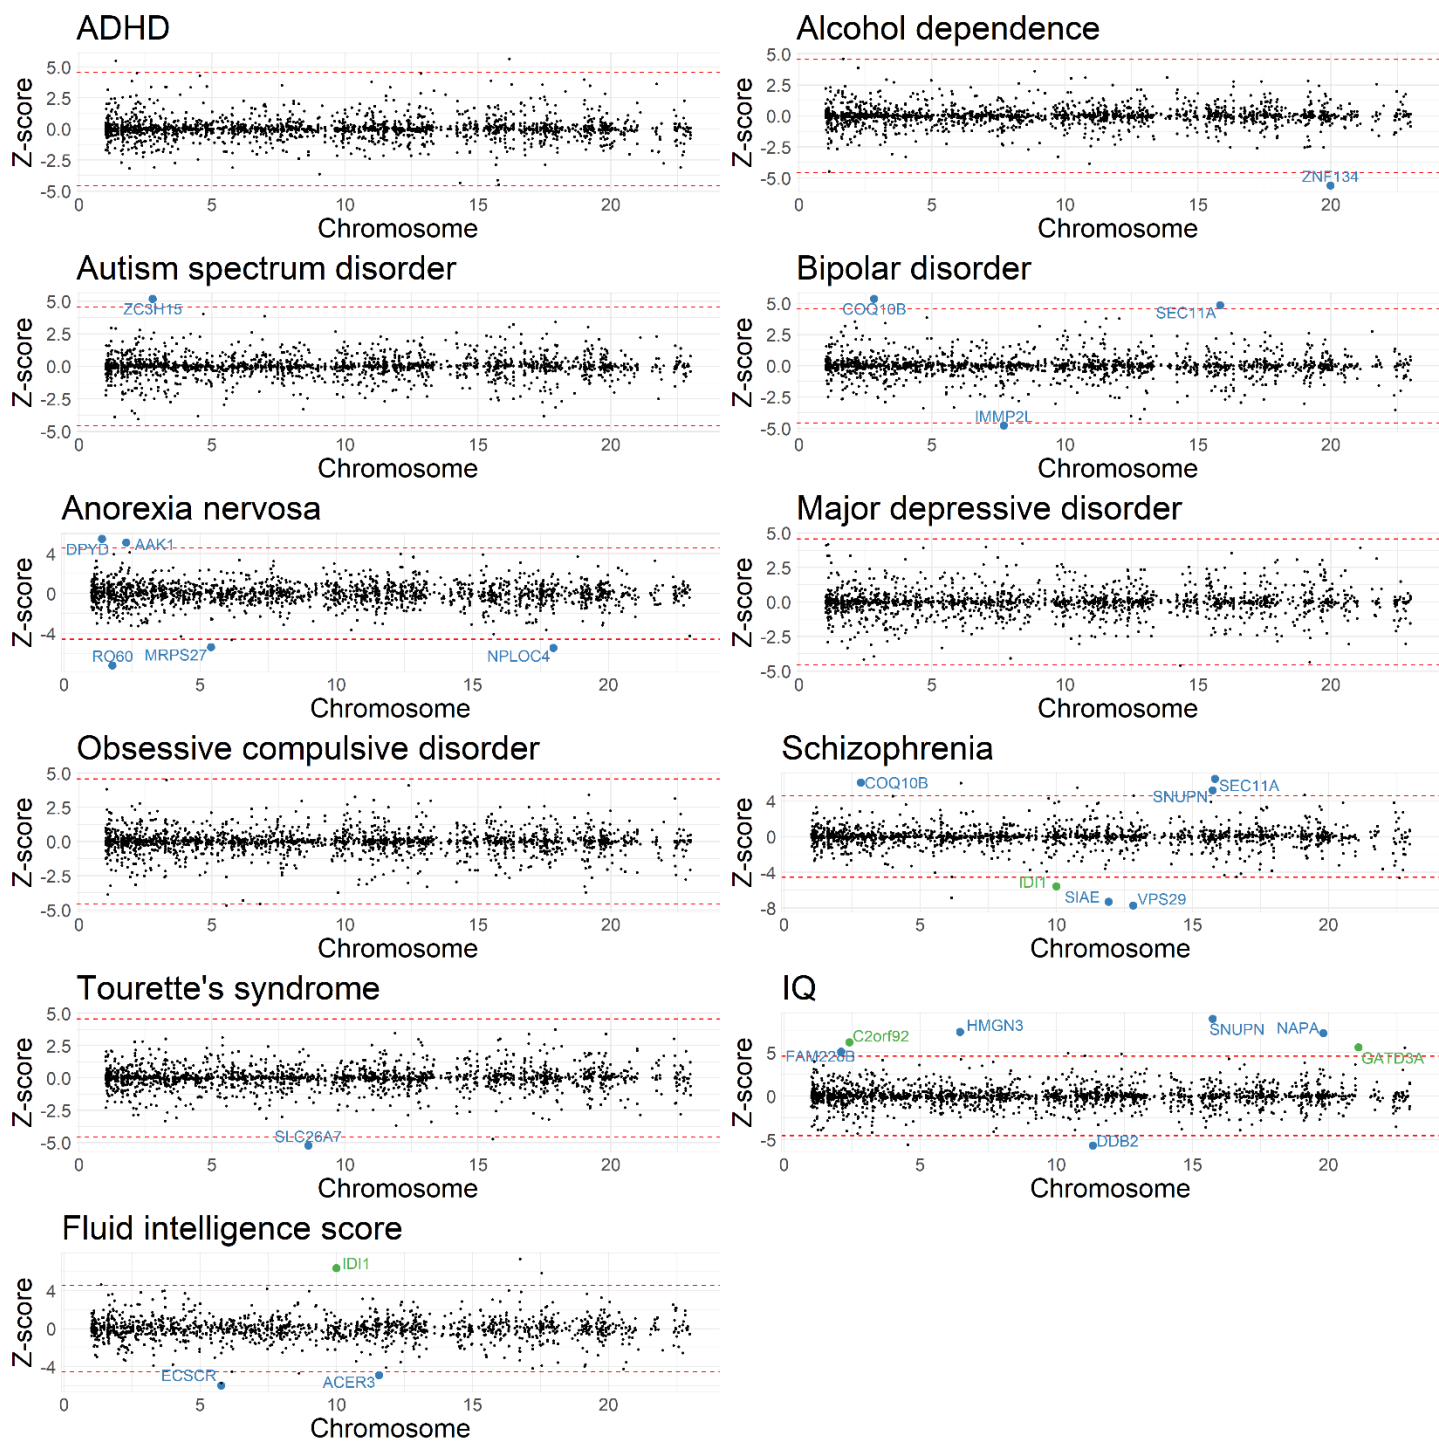

**Figure S7: TWAS Miami plots for neuropsychiatric outcomes.** Weighted two-sided Z-scores for TWAS associations (Y-axis) over genomic location of genes (X-axis). Red lines show Z-scores corresponding to  $P < 2.5 \times 10^{-6}$ . Genes labelled have  $P < 2.5 \times 10^{-6}$ , nominal permutation  $P < 0.05$ , and genes in green showed Benjamini-Hochberg FDR-adjusted  $P < 0.05$  for the distal-SNPs added-last test.

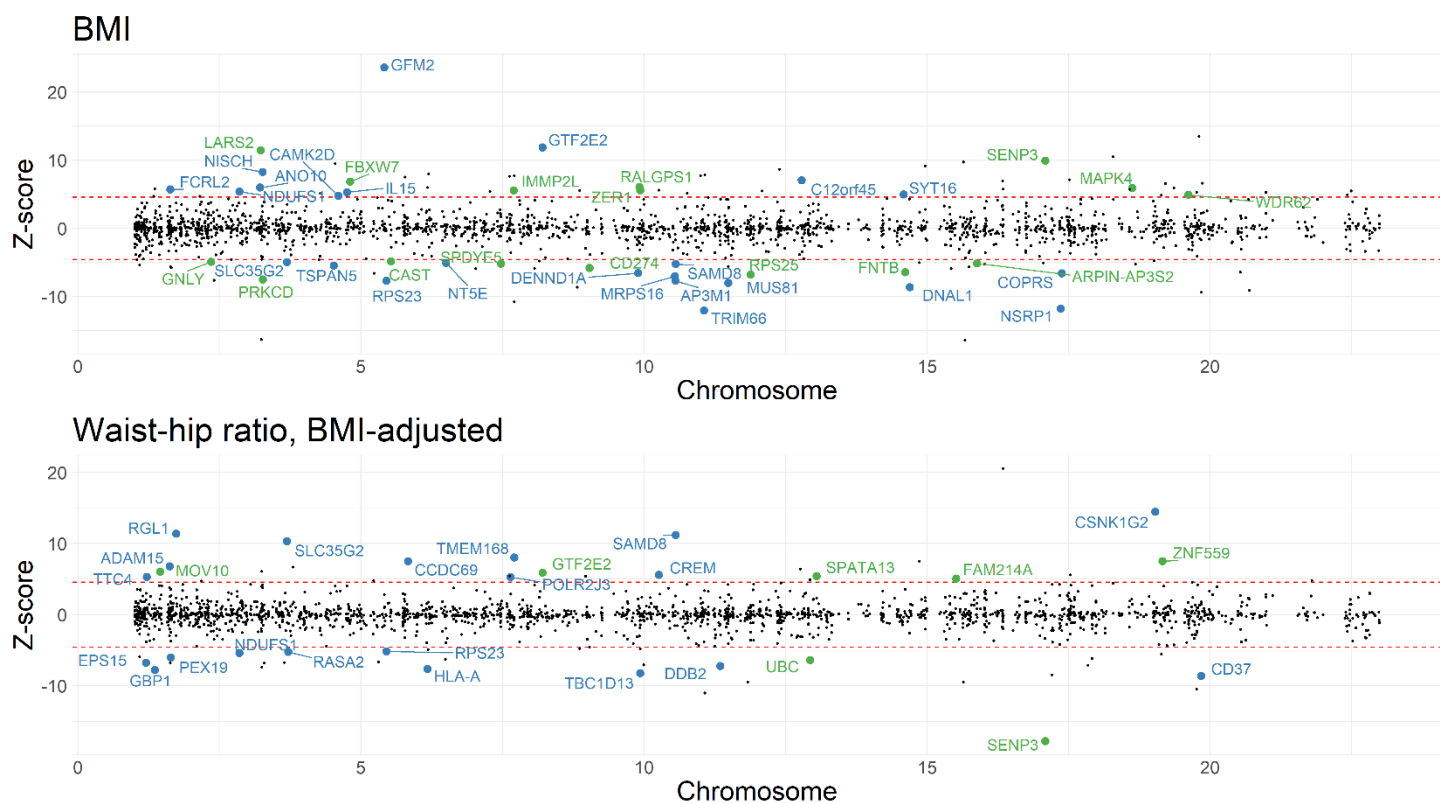

**Figure S8: TWAS Miami plots for BMI and BMI-adjusted waist-hip ratio.** Weighted two-sided Z-scores for TWAS associations (Y-axis) over genomic location of genes (X-axis). Red lines show Z-scores corresponding to  $P < 2.5 \times 10^{-6}$ . Genes labelled have  $P < 2.5 \times 10^{-6}$ , nominal permutation  $P < 0.05$ , and genes in green showed Benjamini-Hochberg FDR-adjusted  $P < 0.05$  for the distal-SNPs added-last test.

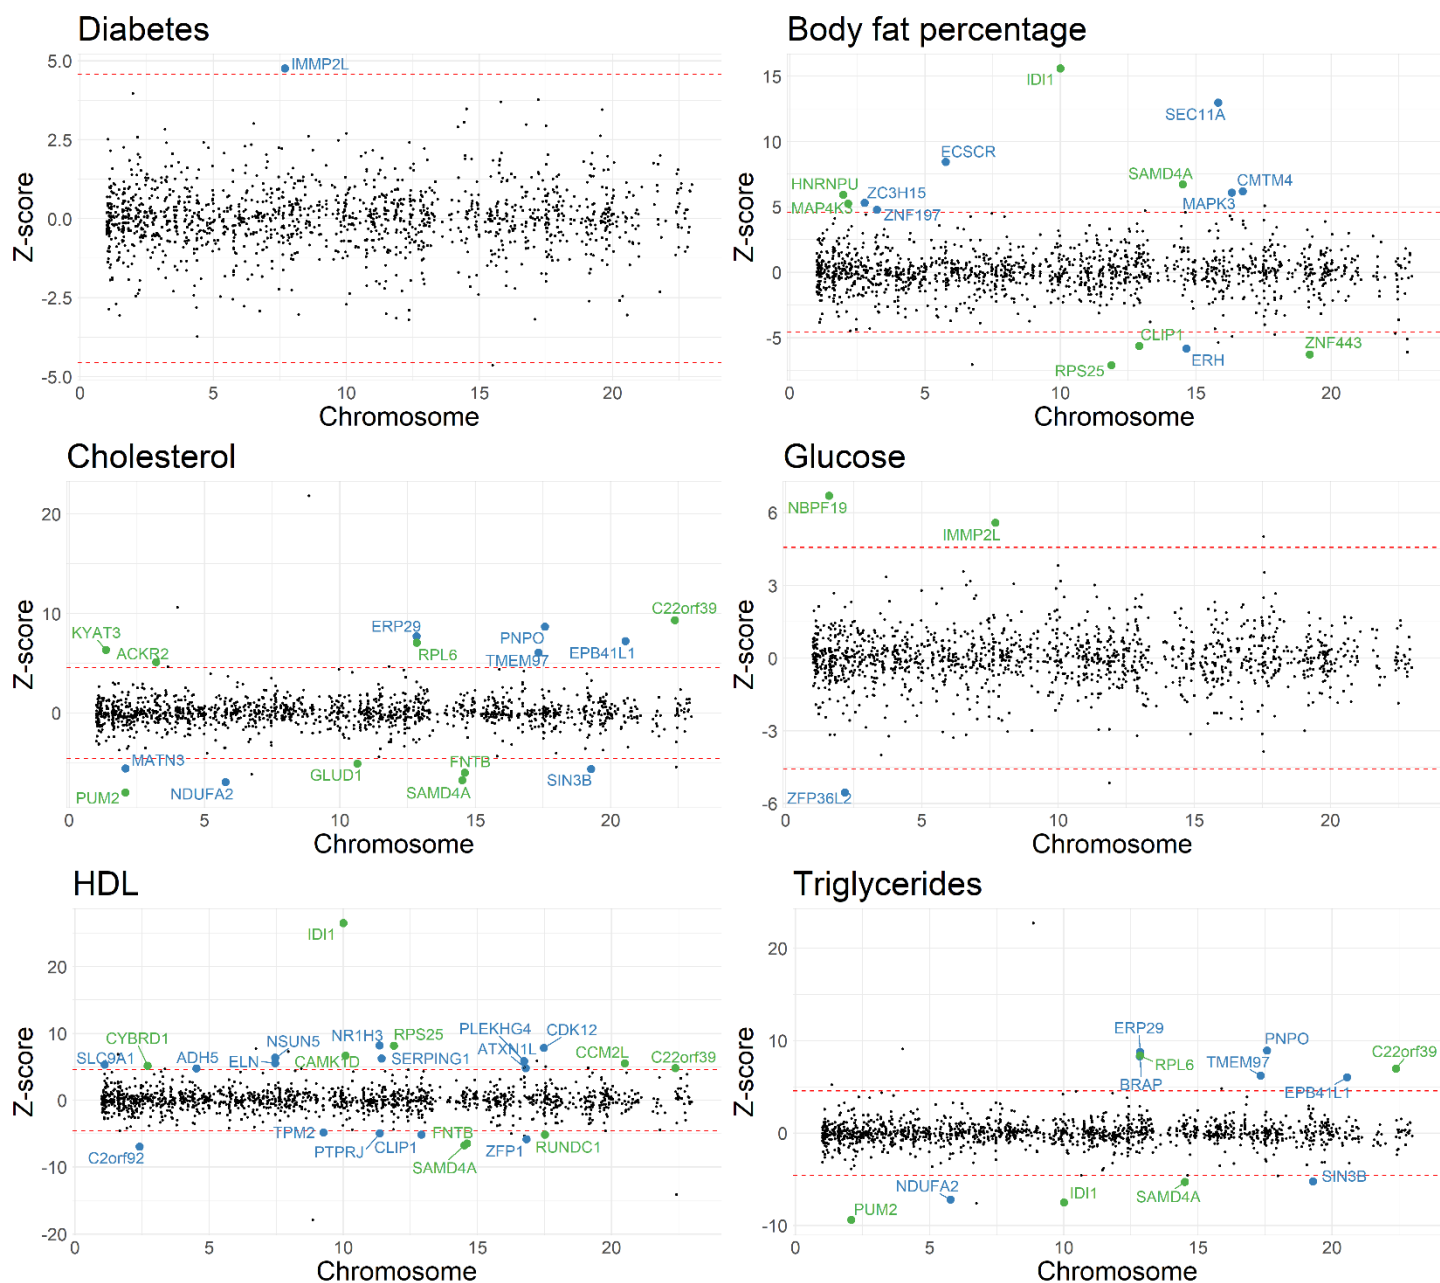

**Figure S9: TWAS Miami plots for body size/metabolic traits, excluding BMI and BMI-adjusted waist-hip ratio.** Weighted two-sided Z-scores for TWAS associations (Y-axis) over genomic location of genes (X-axis). Red lines show Z-scores corresponding to  $P < 2.5 \times 10^{-6}$ . Genes labelled have  $P < 2.5 \times 10^{-6}$ , nominal permutation  $P < 0.05$ , and genes in green showed Benjamini-Hochberg FDR-adjusted  $P < 0.05$  for the distal-SNPs added-last test.

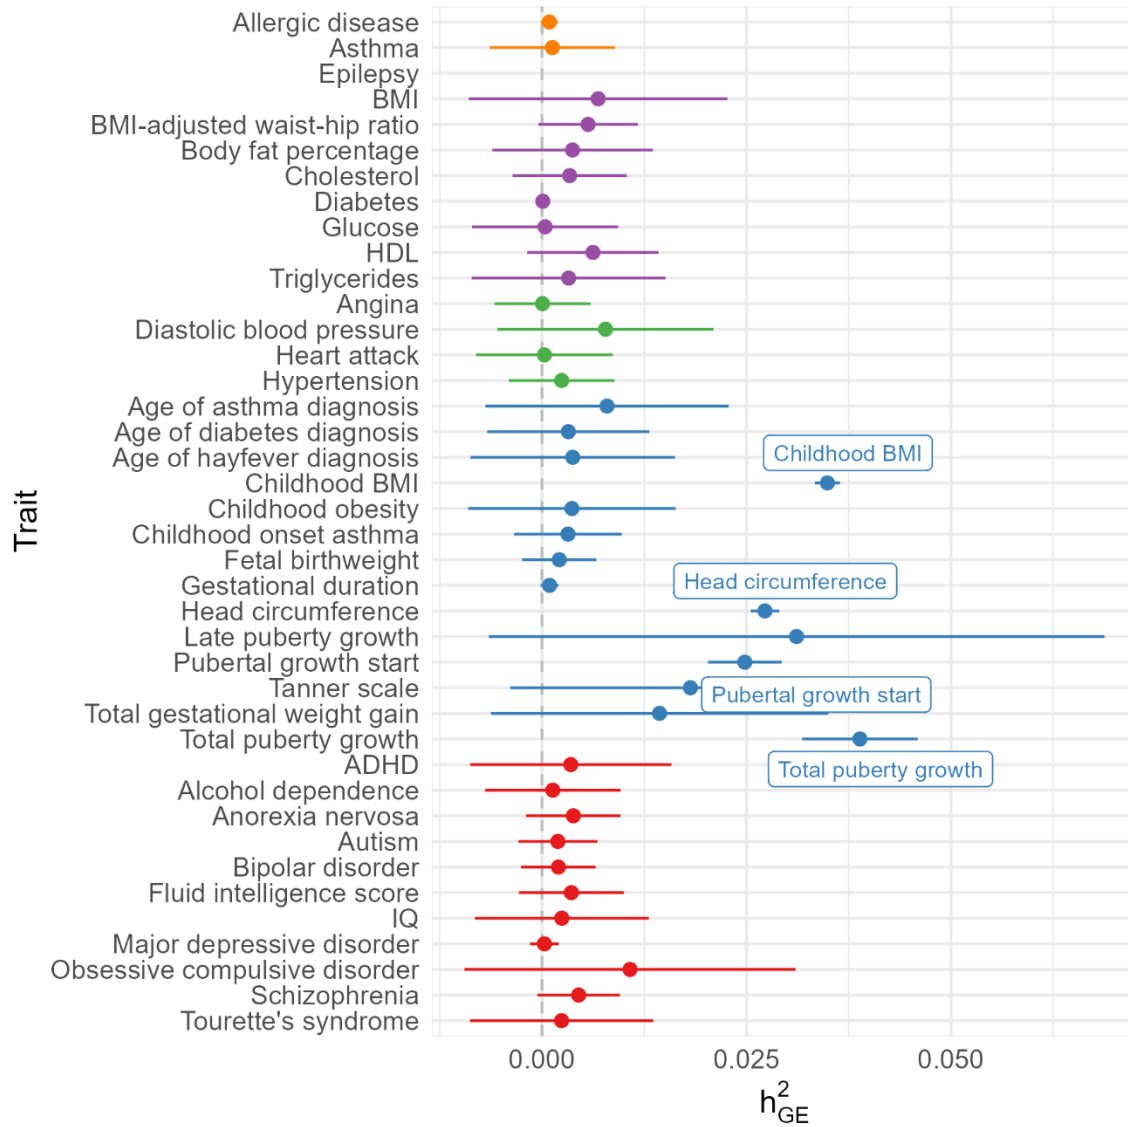

**Figure S10: Placental expression-mediated genetic heritability of traits.** Caterpillar plot of placental expression-mediated genetic heritability of traits (shown as points), colored by trait category. Wald-type 95% confidence intervals are provided for reference. Trait is labelled if the confidence interval does not intersect the null of  $h^2_{GE} = 0$ . Sample sizes are provided in Supplemental Table S1.

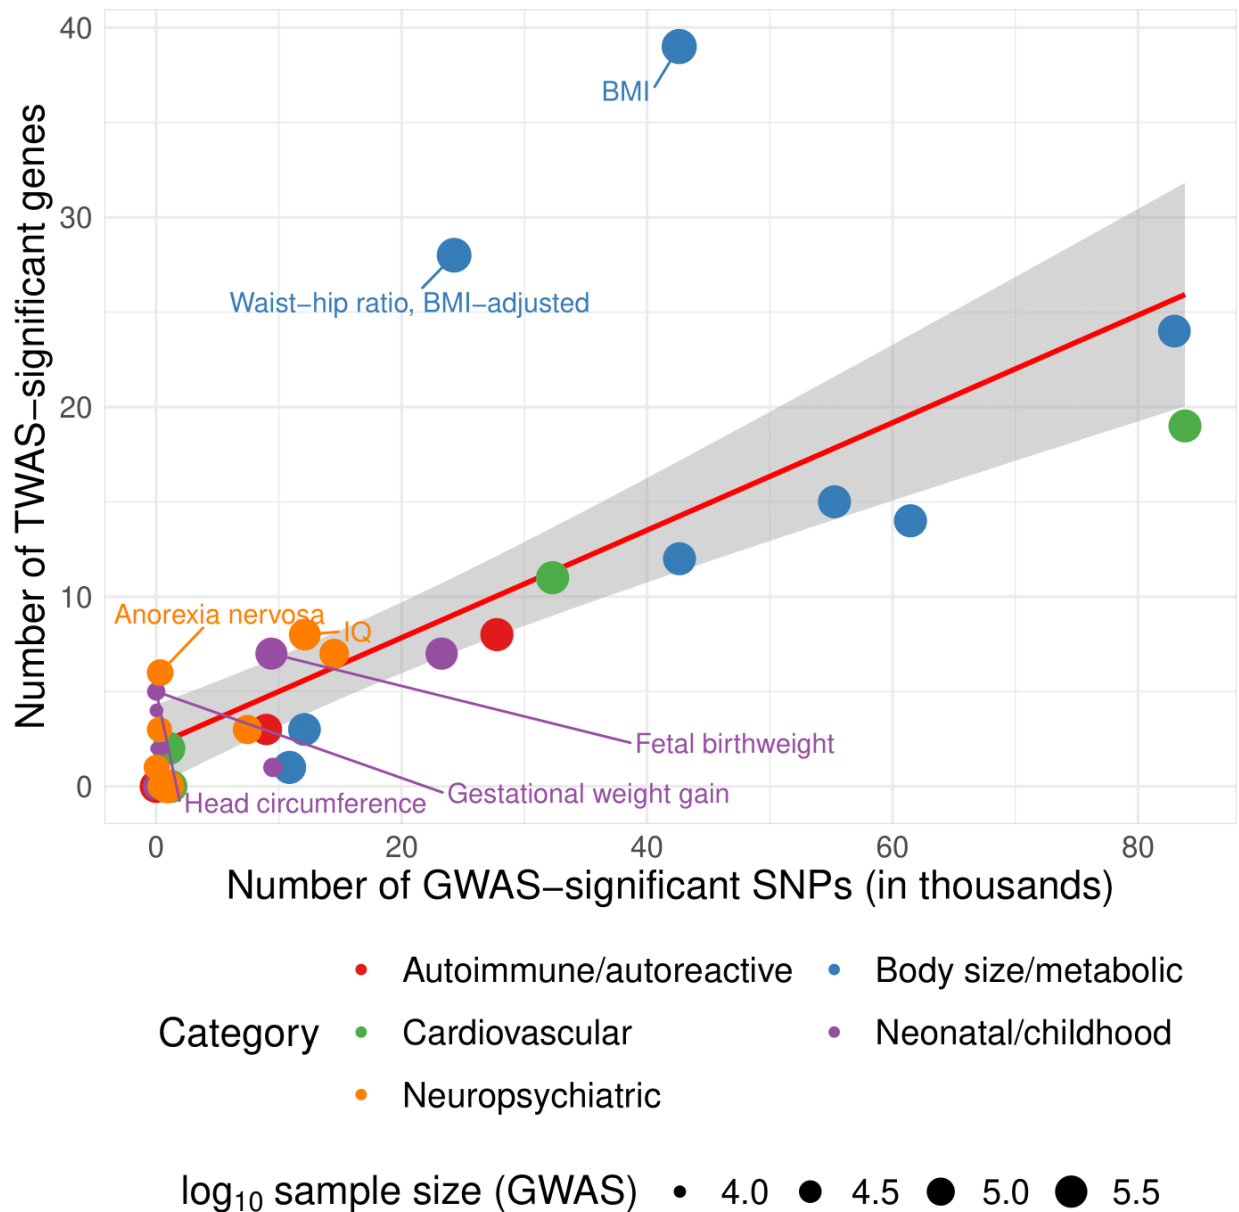

**Figure S11: Comparison of GWAS and TWAS results across all 40 traits.** Scatterplot of number of TWAS-significant genes (Y-axis) and number of GWAS-significant SNPs (X-axis) across all 40 traits, colored by category of the trait. The size of the point shows the  $\log_{10}$  sample size of the GWAS. The red line and gray band provide a regression line and 95% Wald-type confidence band for the fitted values. Points are labelled if the point falls outside the confidence band.

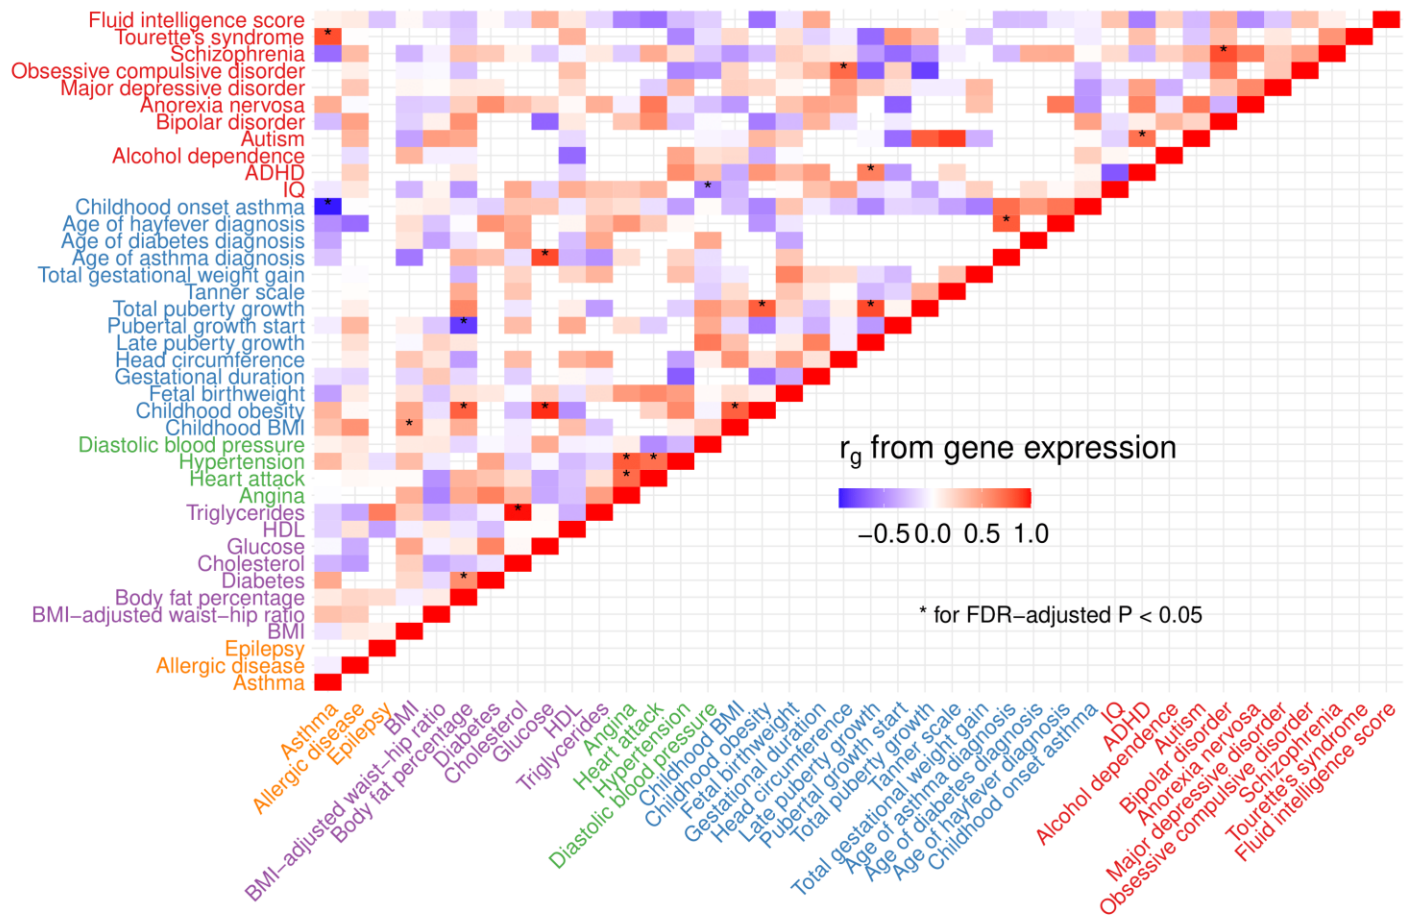

**Figure S12: Heatmap of genetic correlations on the heritable gene expression level between 40 traits considered in TWAS analysis.** Genetic correlations between traits at the level of the predicted expression of heritable genes. Correlations at FDR-adjusted  $P < 0.05$  are marked with an asterisk (two-sided Wald-type tests). Autoimmune/autoreactive traits are colored in yellow, body size/metabolic in purple, cardiovascular in green, neonatal/childhood outcomes in blue, and neuropsychiatric in red. Exact P-values are provided in Supplemental Table S3.

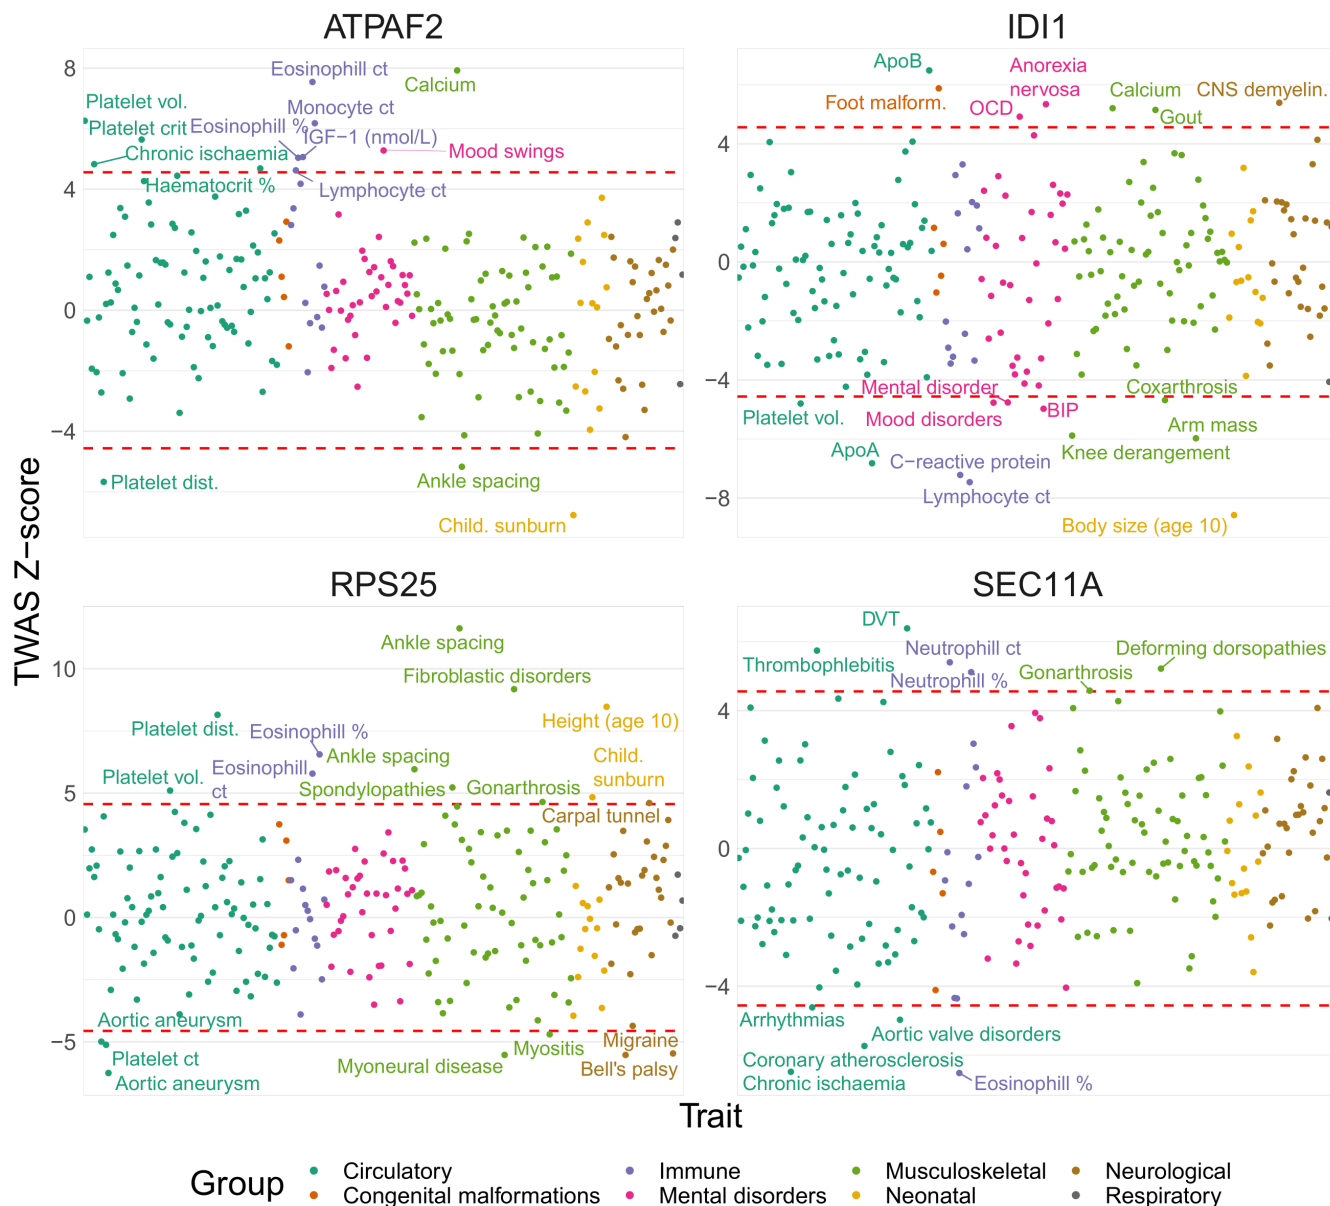

**Figure S13: Miami plot of representative phenotype-wide scans of GTAs in UKBB.** Weighted burden Z-score (Y-axis) of GTA across all traits (X-axis), grouped and colored by ICD code block.

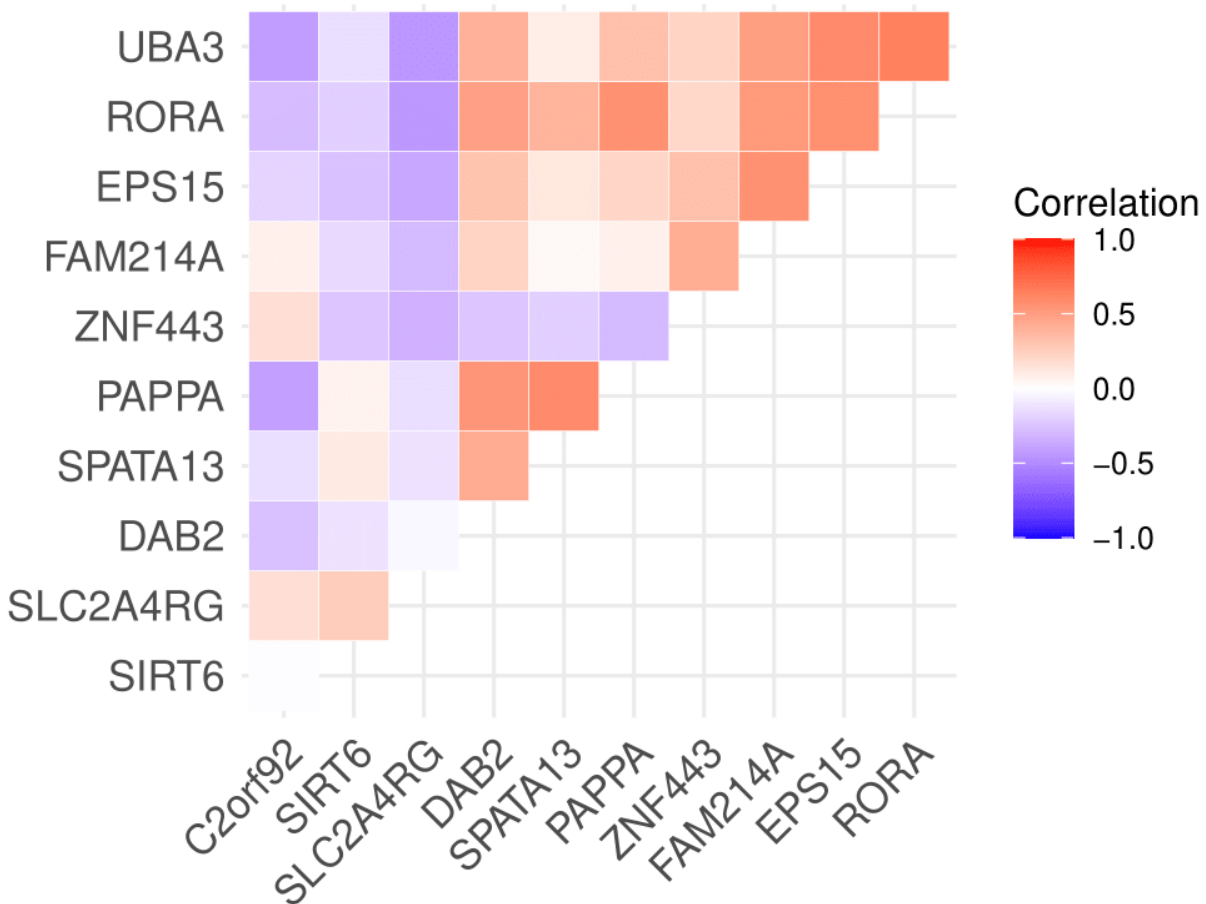

**Figure S14: Heatmap of correlations between select regulatory protein-encoding and TWAS-identified genes in RICHs.** Correlations between the RICHs expression of RPs (Y-axis) and associated TWAS genes identified by MOSTWAS in ELGAN (X-axis).

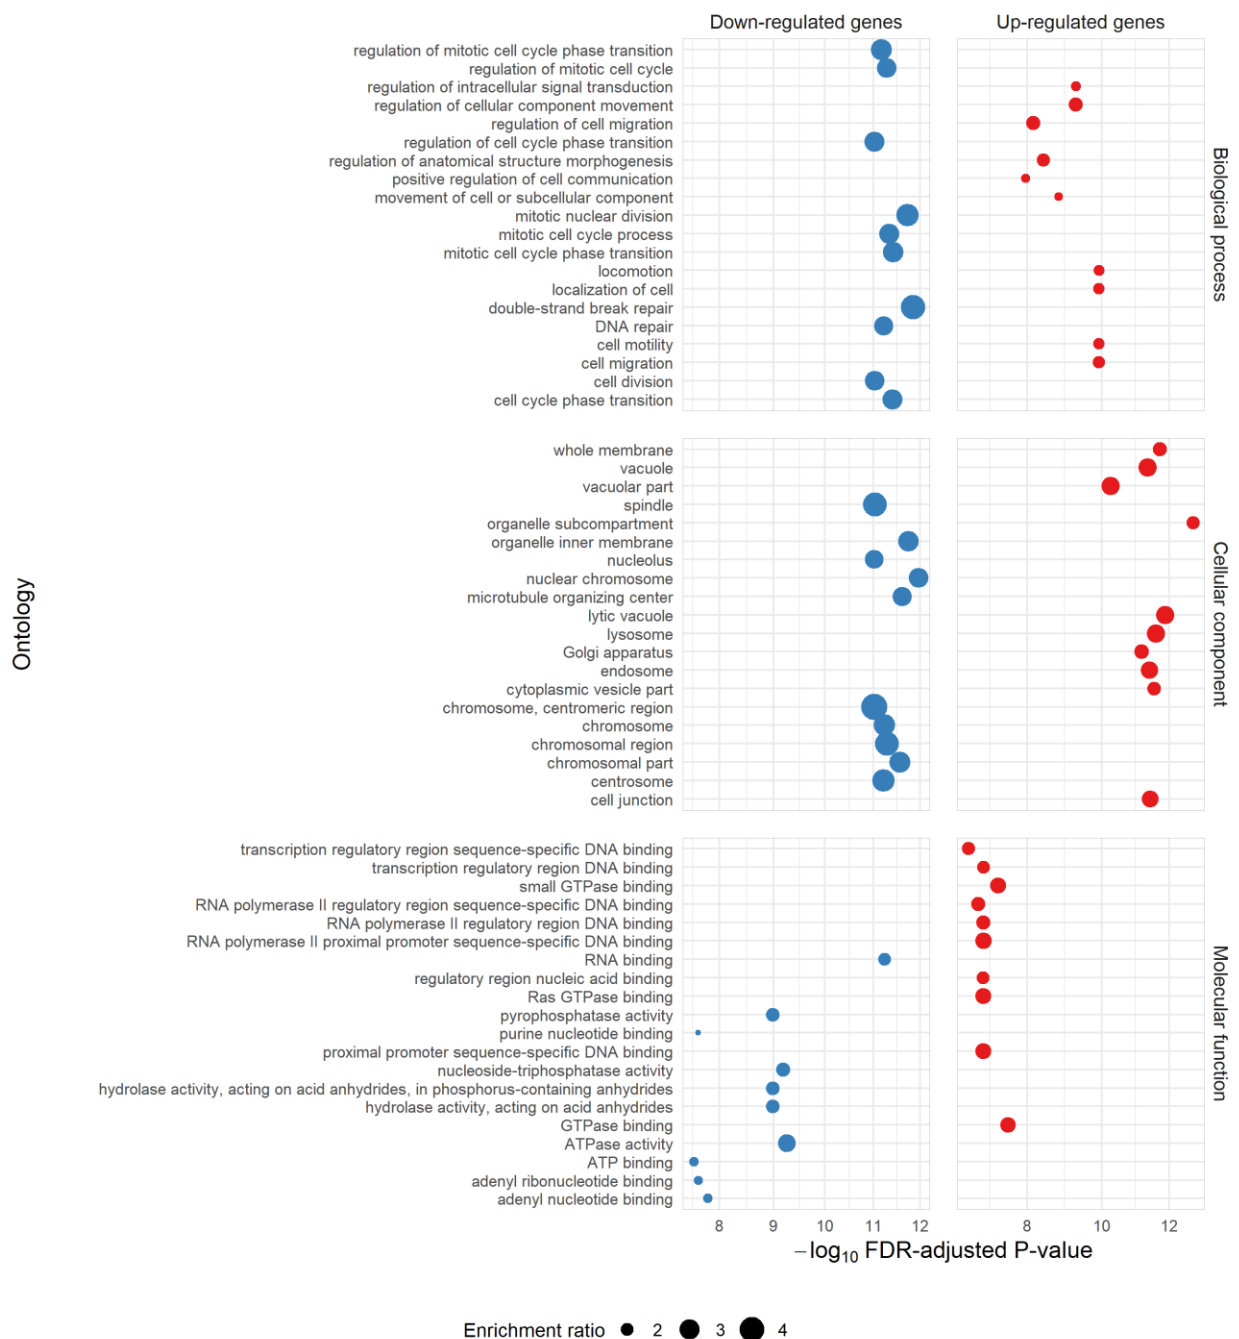

**Figure S15: Over-representation enrichments of differentially expressed genes in *EPS15* knockdown.** Enrichment plot of over-representation of biological process, cellular component, and molecular function ontologies (Y-axis) with  $-\log_{10}$  FDR-adjusted P-value (X-axis; one-sided Fisher's exact test). The size of the point gives the relative enrichment ratio for the given pathway.
