# Supplementary material for: Placental genomics mediates genetic associations with complex health traits and disease
Source: Nat Commun. 2022 Feb 4;13:706. doi: 10.1038/s41467-022-28365-x (PMC8817049; doi:10.1038/s41467-022-28365-x)
Supplement: Supplementary file 3 — Description of Additional Supplementary Files [file 41467_2022_28365_MOESM3_ESM.pdf]

## **Description of Additional Supplementary Files**

**Supplementary Data 1: Overview of 40 traits and GWAS consider in analysis.** The consortium, trait category, trait, URL for summary statistics, sample size, number of cases (if binary trait), SNP heritability estimate and standard error, Lambda GC, mean  $\chi^2$  statistic, reference DOI for GWAS, and expression mediated heritability and standard errors (using all and all TWAS-significant genes) are provided in order.

**Supplementary Data 2: Comparison of GWAS and TWAS associations.** The category, trait, GWAS sample size, number of cases, number of significant GWAS SNPs ( $P < 5 \times 10^{-8}$ ), and number of significant total and GWAS-overlapping TWAS associations ( $P < 2.5 \times 10^{-6}$ ) are provided in order.

**Supplementary Data 3: Genetic correlations between traits at SNP- and placenta-expression mediated levels.** Genetic correlations, standard errors, two-sided Z-test statistic, P-value, FDR-adjusted P-value, and genetic covariance and standard errors are provided for all pairs of traits.

**Supplementary Data 4: Demographic and clinical covariates summary statistics of ELGAN and RICHs samples.**

**Supplementary Data 5: Summary of in- and out-sample predictive performance of MOSTWAS placental expression models.** Mean, standard deviation, 25% quantile, median, and 75% quantile of gene expression heritability, in-sample cross-validation  $R^2$  in ELGAN, and out-sample  $R^2$  in RICHs.

**Supplementary Data 6: Summary of 248 significant TWAS gene-trait associations.** For each gene and trait, the trait category, chromosomal position of the gene, expression heritability and associated likelihood ratio test P-value, cross-validation predictive performance for gene model, TWAS two-sided weighted burden Z-score and P-value, two-sided permutation test P-value, top SNP and P-value in GWAS among SNPs used in the gene model, distal Z-score and P-value, and identified mediators are provided, in order.

**Supplementary Data 7: Over-representation analysis of TWAS genes.** Biological process, molecular function, and PANTHER pathway ontologies enriched for TWAS-identified genes associated with each trait at FDR-adjusted  $P < 0.05$ .

**Supplementary Data 8: Genetic correlations between traits at placental expression-mediated level.** For each pair of traits, the genetic correlation, standard error, t-statistic and associated degrees of freedom and P-value is provided.

**Supplementary Data 9: Results of fine-mapping of overlapped TWAS genes using FOCUS.** Overlapping genes are provided, with the associated trait, chromosomal positions, TWAS two-sided weighted burden Z-scores and P-values, top GWAS SNP information, posterior inclusion probability, and whether they are included in the credible set for the region. The distal Z-score is also provided.

**Supplementary Data 10:** TWAS-significant genes that do not overlap significant GWAS loci (within 500 kB)

**Supplementary Data 11:** Susceptibility genes associated with multiple traits. TWAS gene, chromosomal location, and associated trait are provided with genetic correlations between traits at SNP level are provided if significant FDR-adjusted  $P < 0.05$ .

**Supplementary Data 12: Results of ELGAN phenome-wide scan of neonatal outcomes.** For each gene and ELGAN phenotype, the effect size, standard error, Wald-type adjusted 95% confidence interval, two-sided Z-score, P-value, and FDR-adjusted P-value are provided.

**Supplementary Data 13: Cis-GReX correlations of TWAS-identified genes with metabolic traits in the Hybrid Mouse Diversity Panel.** For each correlation at Spearman correlated test FDR-adjusted  $P < 0.10$ , the dataset, gene (mouse analog), trait, correlation, and P-value are provided.

**Supplementary Data 14: Over-representation analysis of transcription factors identified as mediators.** For the transcription-factor encoding genes identified as mediators, functional categories, ontologies, FDR-adjusted P-value of enrichment for one-sided Fisher's exact test, number of overlapping genes in the ontology, and the total number of genes in the ontology is given.

**Supplementary Data 15: Trans-eQTL scan using GBAT in RICHS between genetic loci local to MOSTWAS-identified regulatory protein-encoding genes and the expression of the target TWAS gene.** The effect size, P-value of two-sided Z-test, and FDR-adjusted P-value are provided.

**Supplementary Data 16: Results from MR-Egger to assess causal effects of transcription factors on targeted TWAS genes.** For each RP-TWAS pair, the causal estimate, confidence interval, P-value for two-sided Wald-type test, residual standard error, heterogeneity statistic, and heterogeneity P-value for heterogeneity Chi-squared test are provided.

**Supplementary Data 17: MOSTWAS-identified CpG site mediators found within ENCODE-identified placenta cis-regulatory sites.** For each CpG site mediator that overlaps with a placental cis-regulatory site, the chromosomal location of the regulatory site, the classification of the regulatory site, tissue, gestational time, sex, and accession number are provided.

**Supplementary Data 18: Summary statistics of down-regulated differentially expressed genes in EPS15 knockdown cells.** For each gene with FDR-adjusted  $P < 0.01$ , we provide the gene name,  $\log_2$  fold change, standard error, and P-value of two-sided Wald-type test.

**Supplementary Data 19: Summary statistics of up-regulated differentially expressed genes in EPS15 knockdown cells.** For each gene with FDR-adjusted  $P < 0.01$ , we provide the gene name,  $\log_2$  fold change, standard error, and P-value of two-sided Wald-type test.

**Supplementary Data 20: Over-representation analysis of down-regulated genes.** Biological process, molecular function, and PANTHER and KEGG pathway ontologies enriched for down-regulated genes in *EPS15* knockdown cells associated with each trait at FDR-adjusted  $P < 0.05$  for one-sided Fisher's exact test.

**Supplementary Data 21: Over-representation analysis of up-regulated genes.** Biological process, molecular function, and PANTHER and KEGG pathway ontologies enriched for up-regulated genes in *EPS15* knockdown cells associated with each trait at FDR-adjusted  $P < 0.05$  for one-sided Fisher's exact test.
